# Supplementary material for: Physicochemical Fundamentals of the Synthesis of a Cu@BN Composite Consisting of Nanosized Copper Enclosed in a Boron Nitride Matrix
Source: MDPI journal article supplement (doi:10.3390/inorganics11080345), 2023-08-21
Supplement: s1 [file s1]

## SUPPORTING INFORMATION

for

### Physicochemical Fundamentals of the Synthesis of a Cu@BN Composite Consisting of Nanosized Copper Enclosed in a Boron Nitride Matrix

Elena A. Malinina, Ivan I. Myshletsov, Grigorii A. Buzanov, Irina V. Kozerozhets, Nikolai P. Simonenko, Tatiana L. Simonenko, Svetlana E. Nikiforova, **Varvara V. Avdeeva\***, Konstantin Yu. Zhizhin, Nikolay T. Kuznetsov

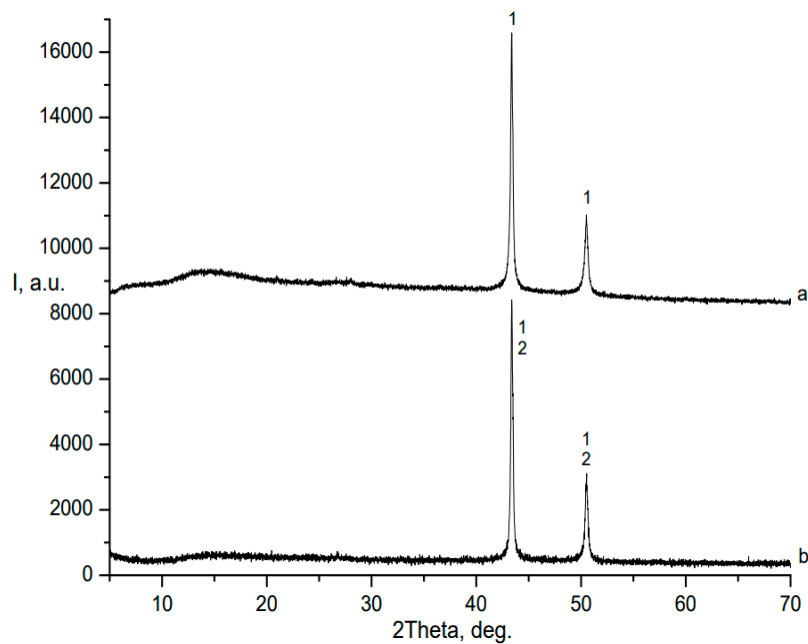

**Fig. S1.** X-ray powder diffraction pattern for  $\text{I}^{900}_{\text{Ar}}$  (b) and  $\text{II}^{900}_{\text{Ar}}$  (a); 1—copper (cubic system), 2—BN (cubic system).
